# Supplementary material
Source: PubMed Central journal article supplement (PMC534614)

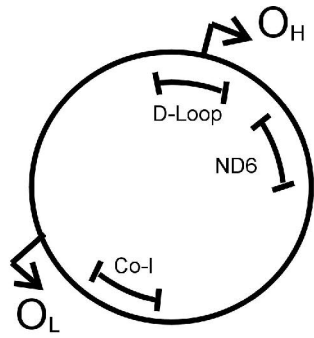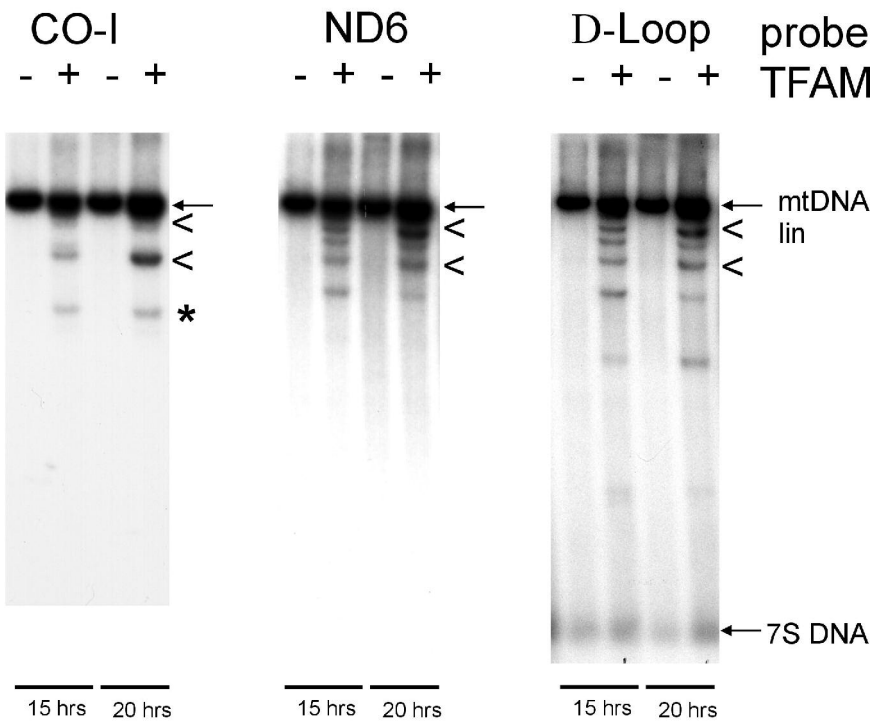

Supplement 3 X

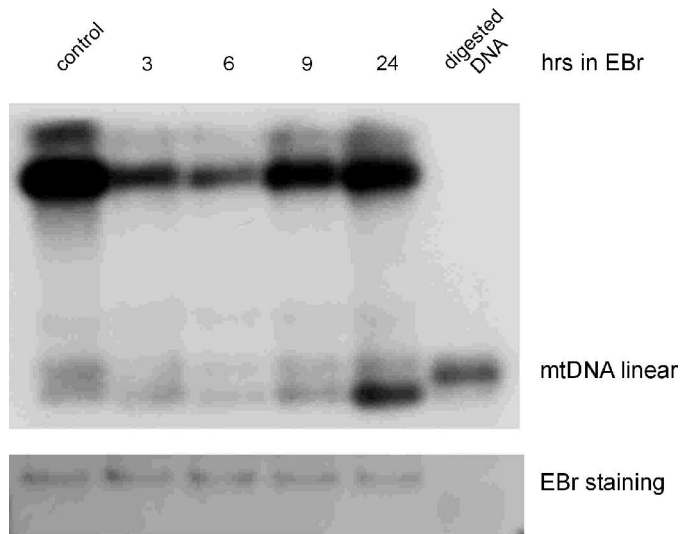

**Supplement 5X**

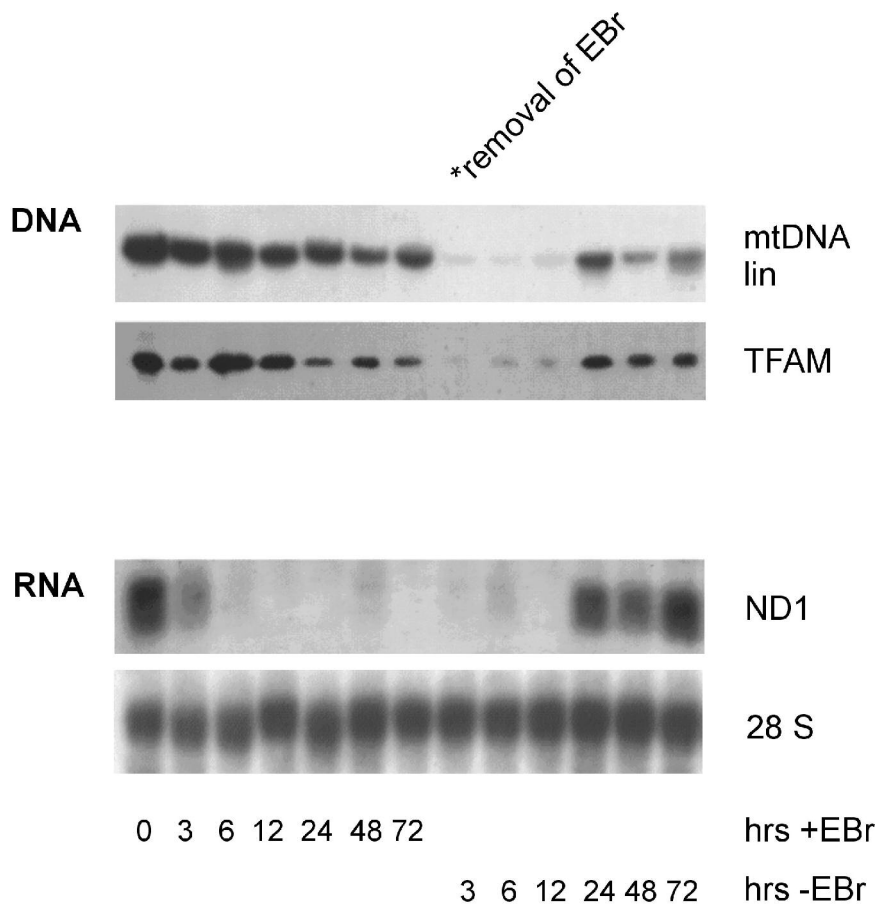

**Supplement 5Y**

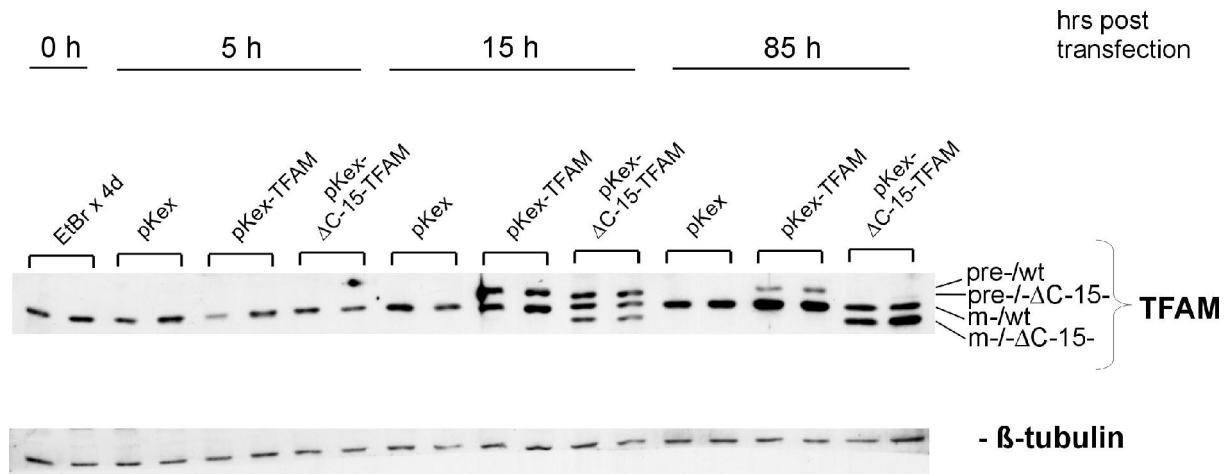

### Supplement 8A

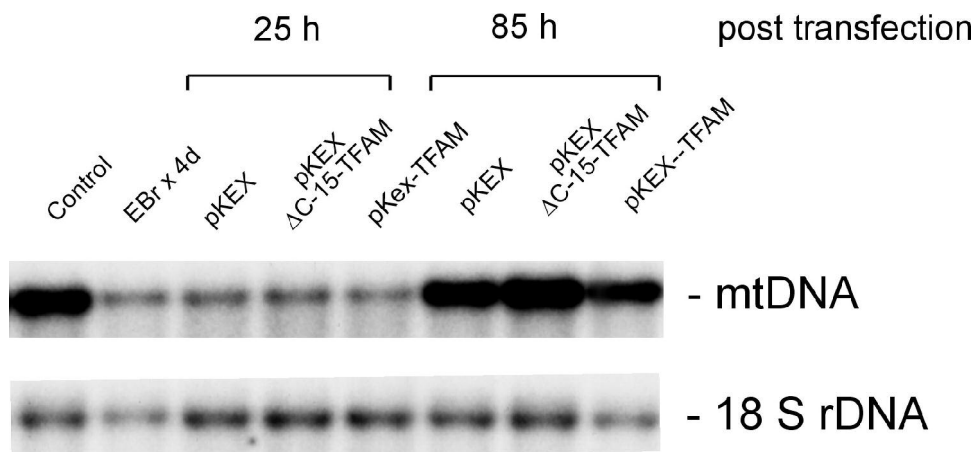

### Supplement 8B

Supplement: nar_32_20_6015__1.pdf [file nar_32_20_6015__1.pdf]
